# Supplementary material for: Food, health, and complexity: towards a conceptual understanding to guide collaborative public health action
Source: PubMed Central journal article supplement (PMC4898364; doi:10.1186/s12889-016-3142-6), 2016-06-08

**Supplemental Online Appendix C.**

Tree Diagrams Showing the Relevant Drivers for Each of the Five  
Population Health Issues Related to Food; Drivers in Brackets are  
Those that are Also Found Elsewhere in the Particular Tree

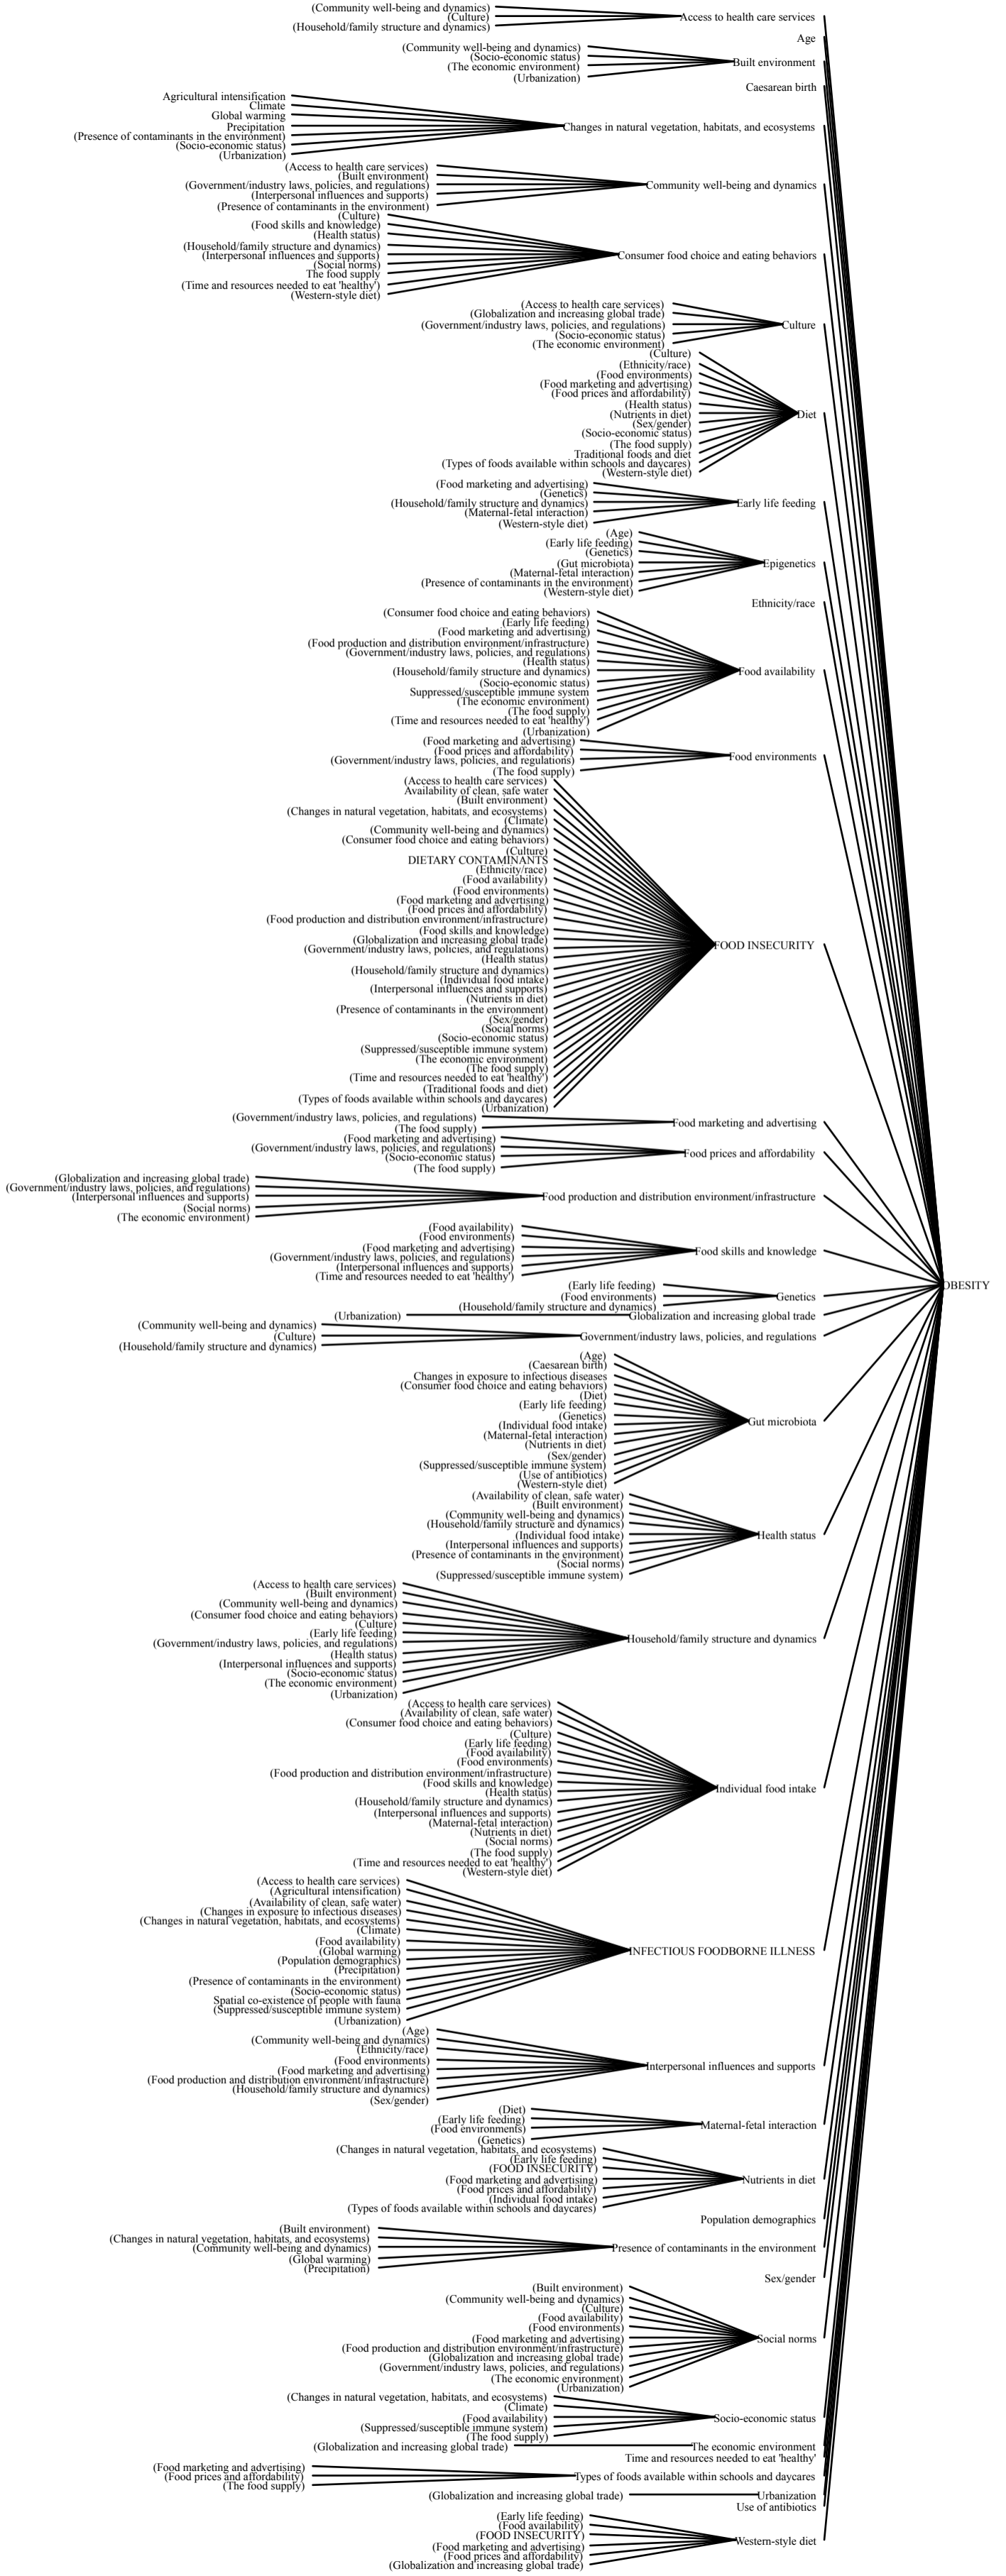

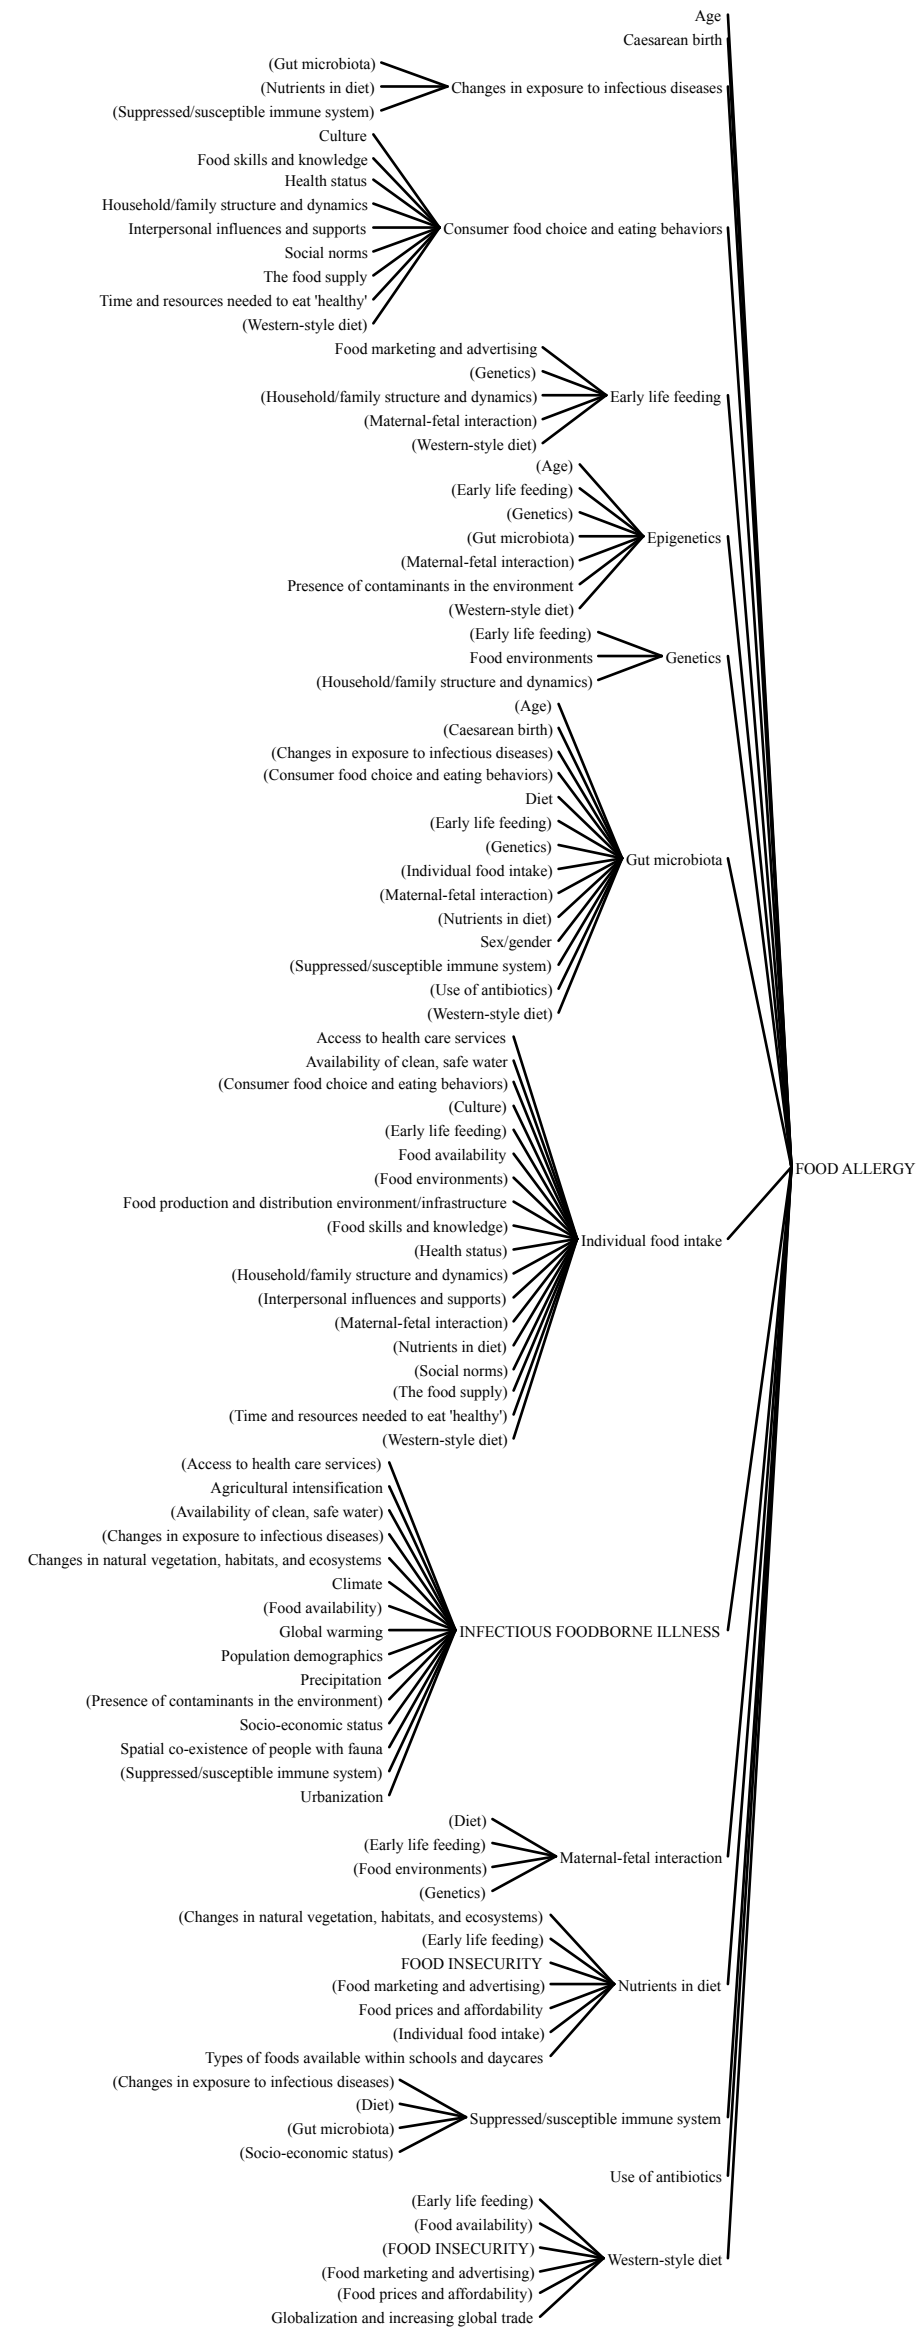

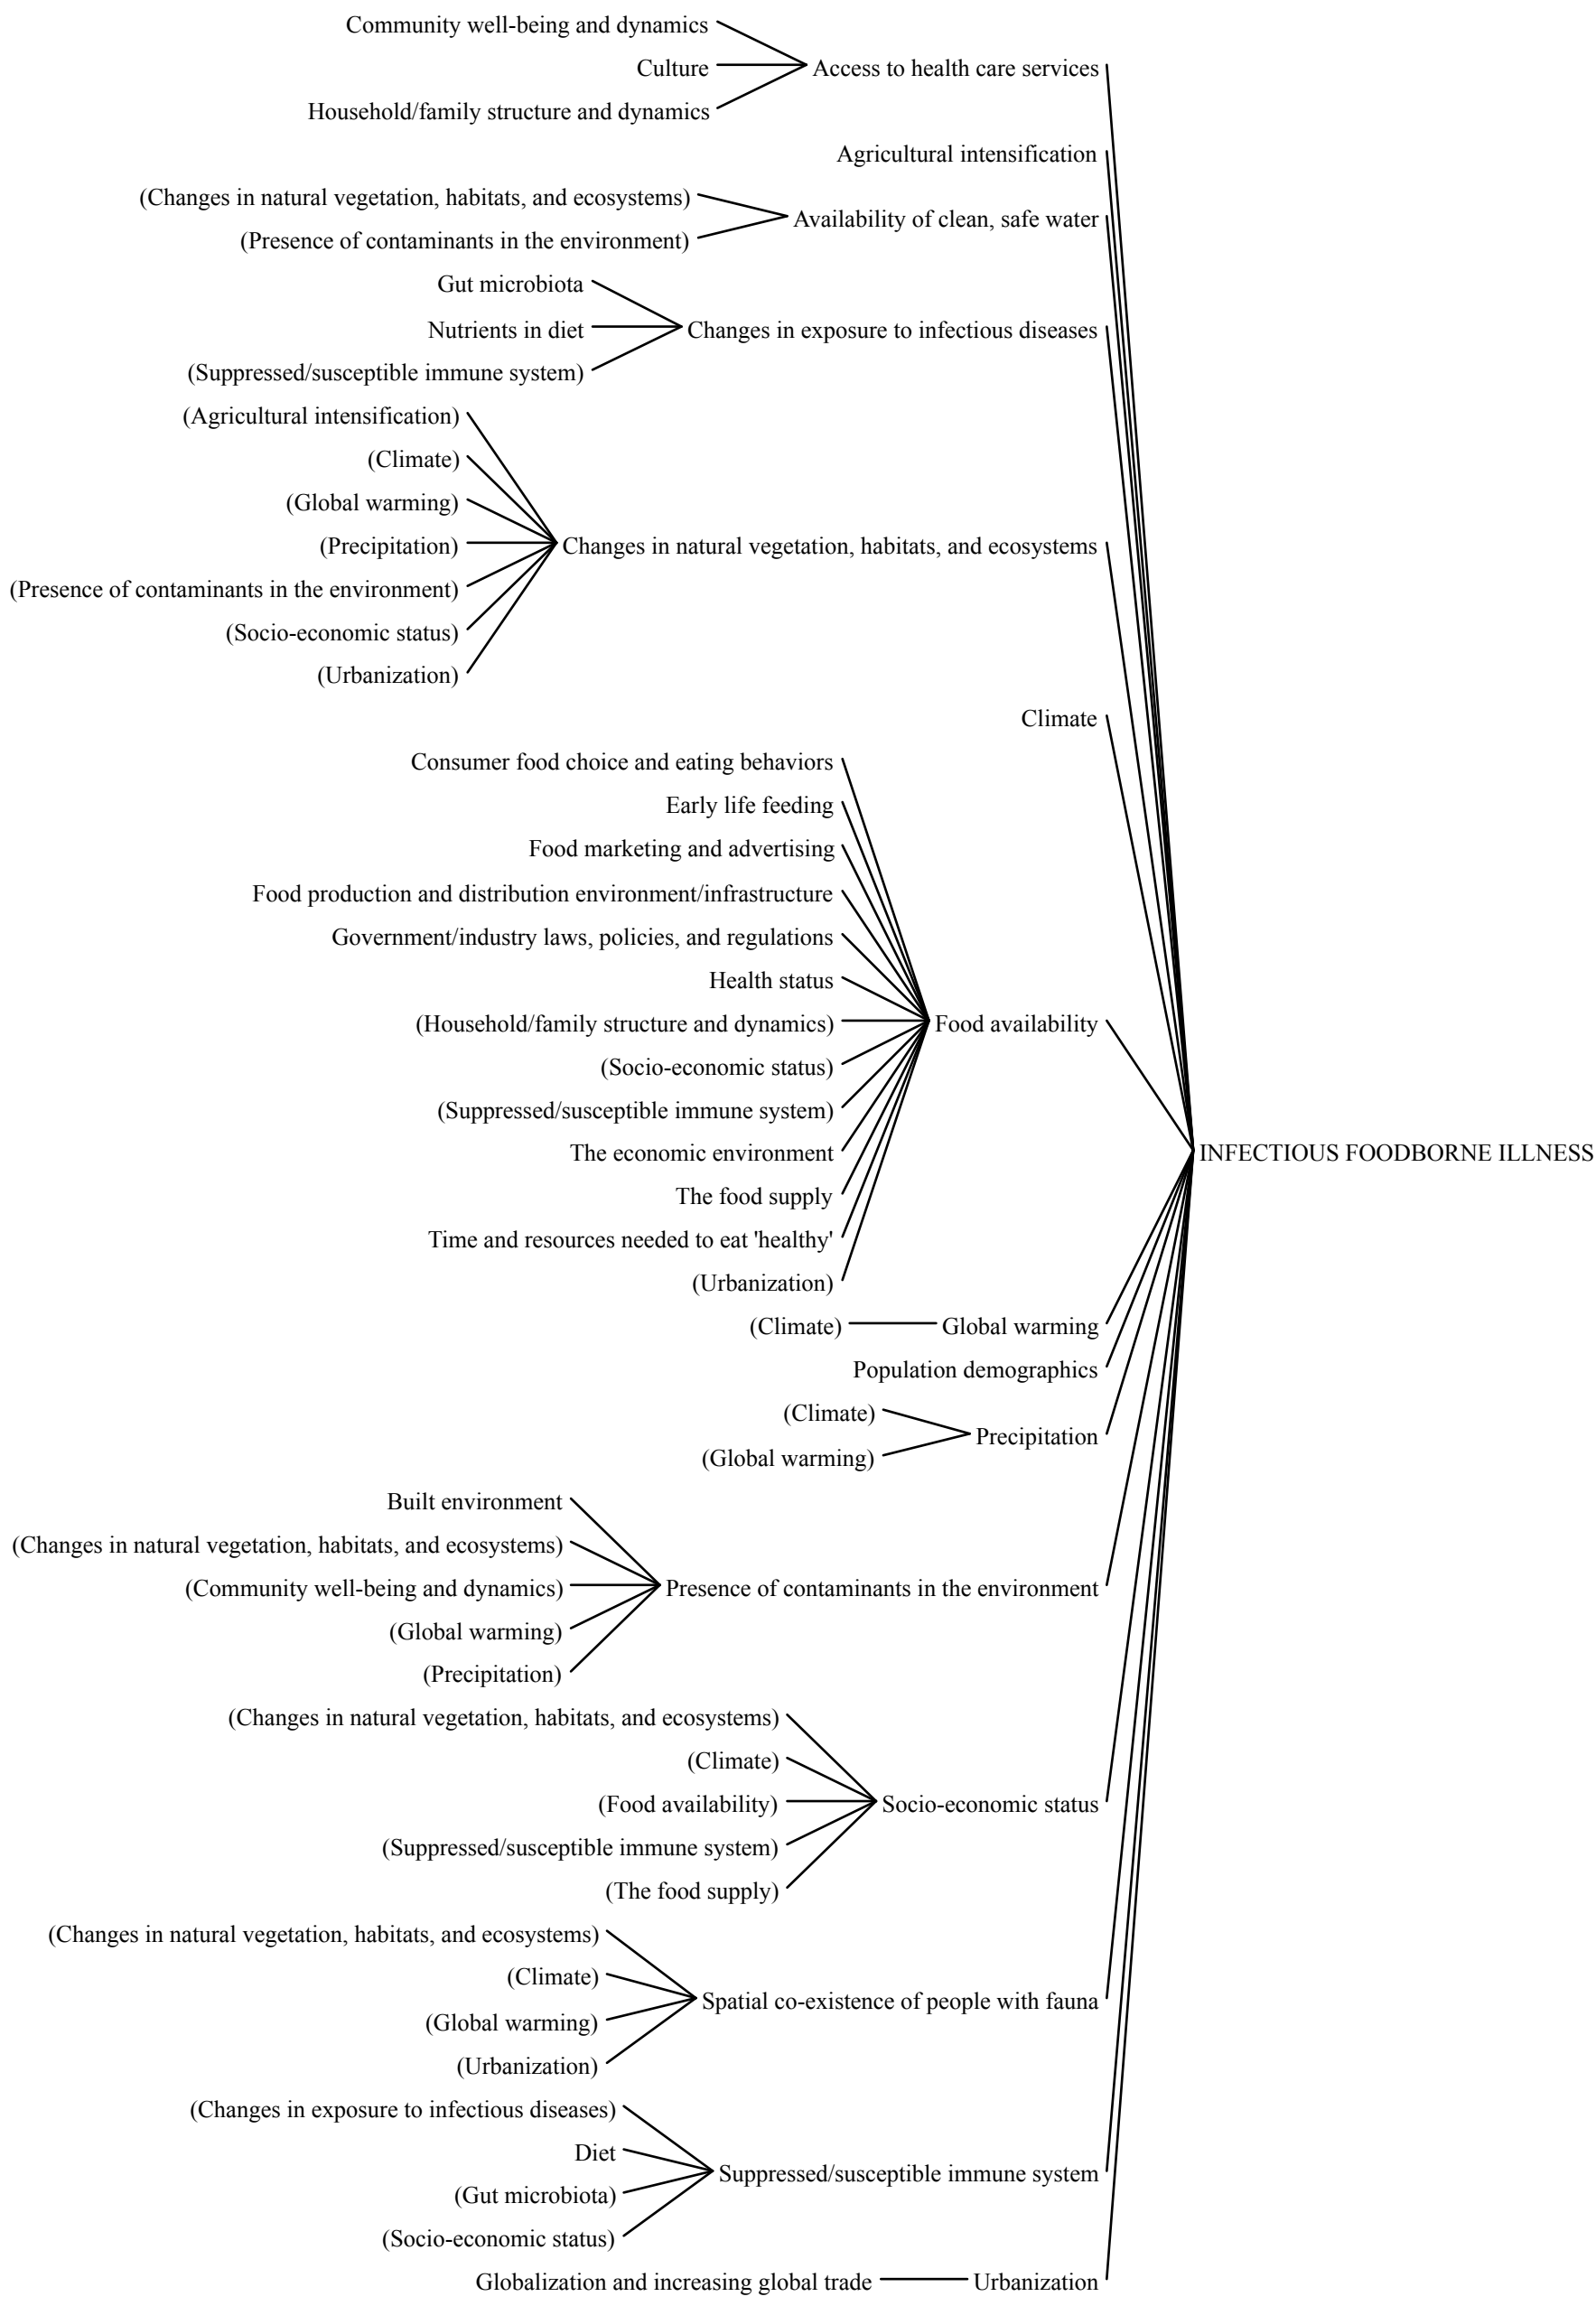

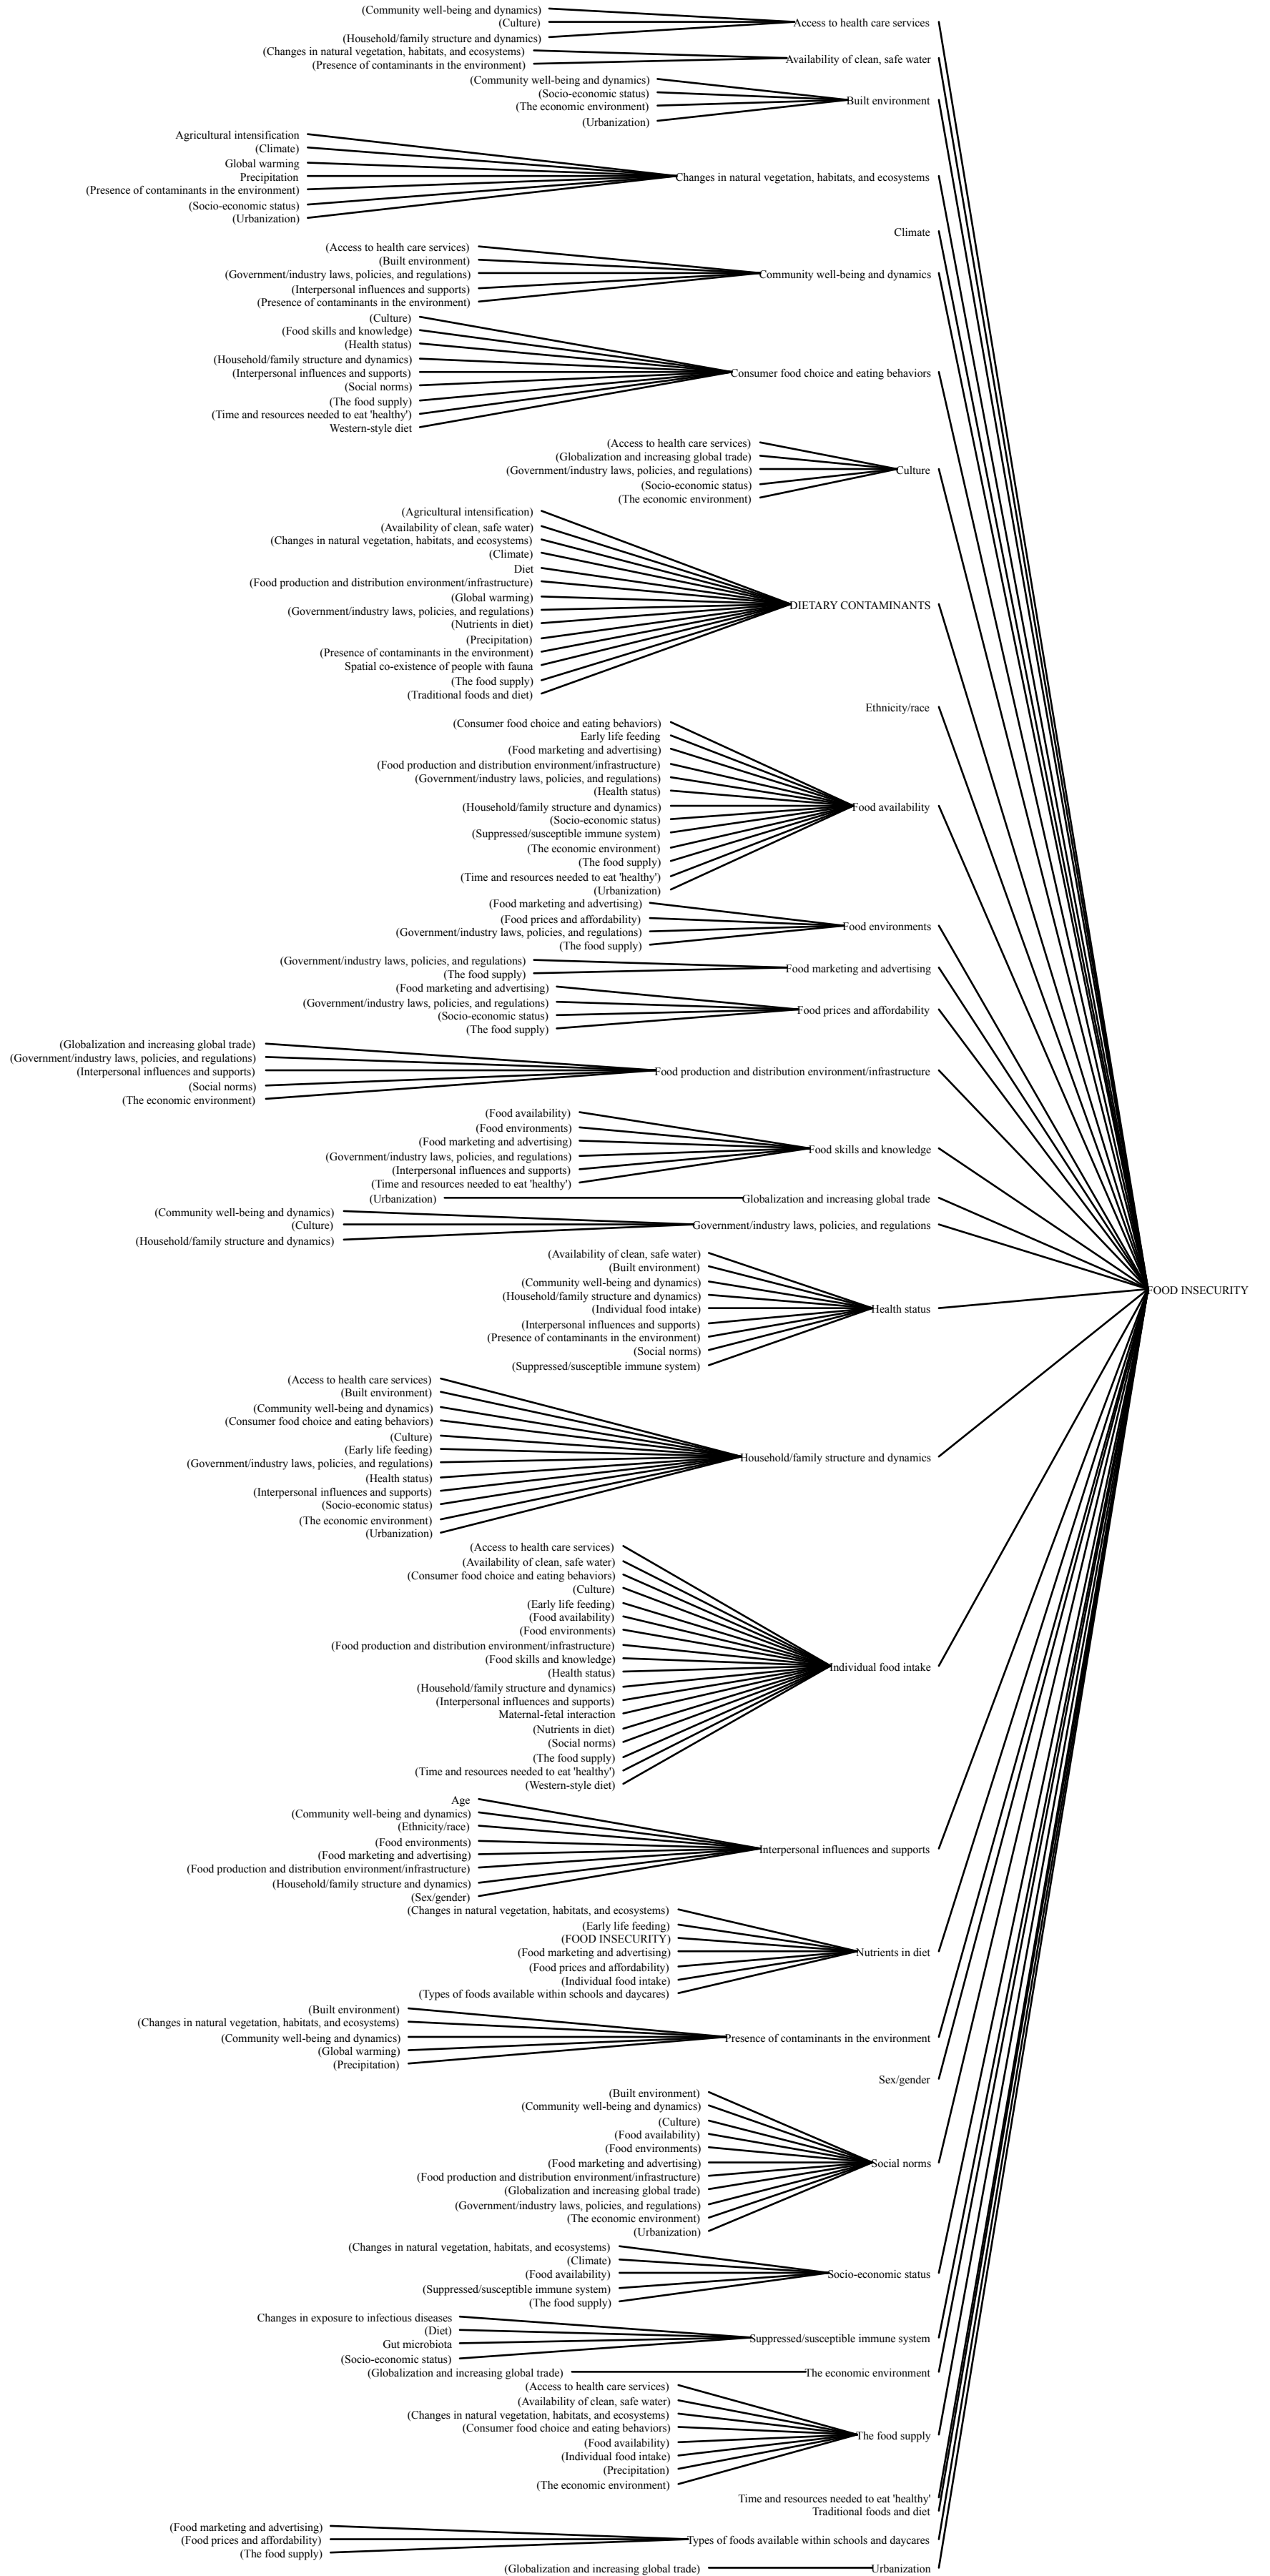

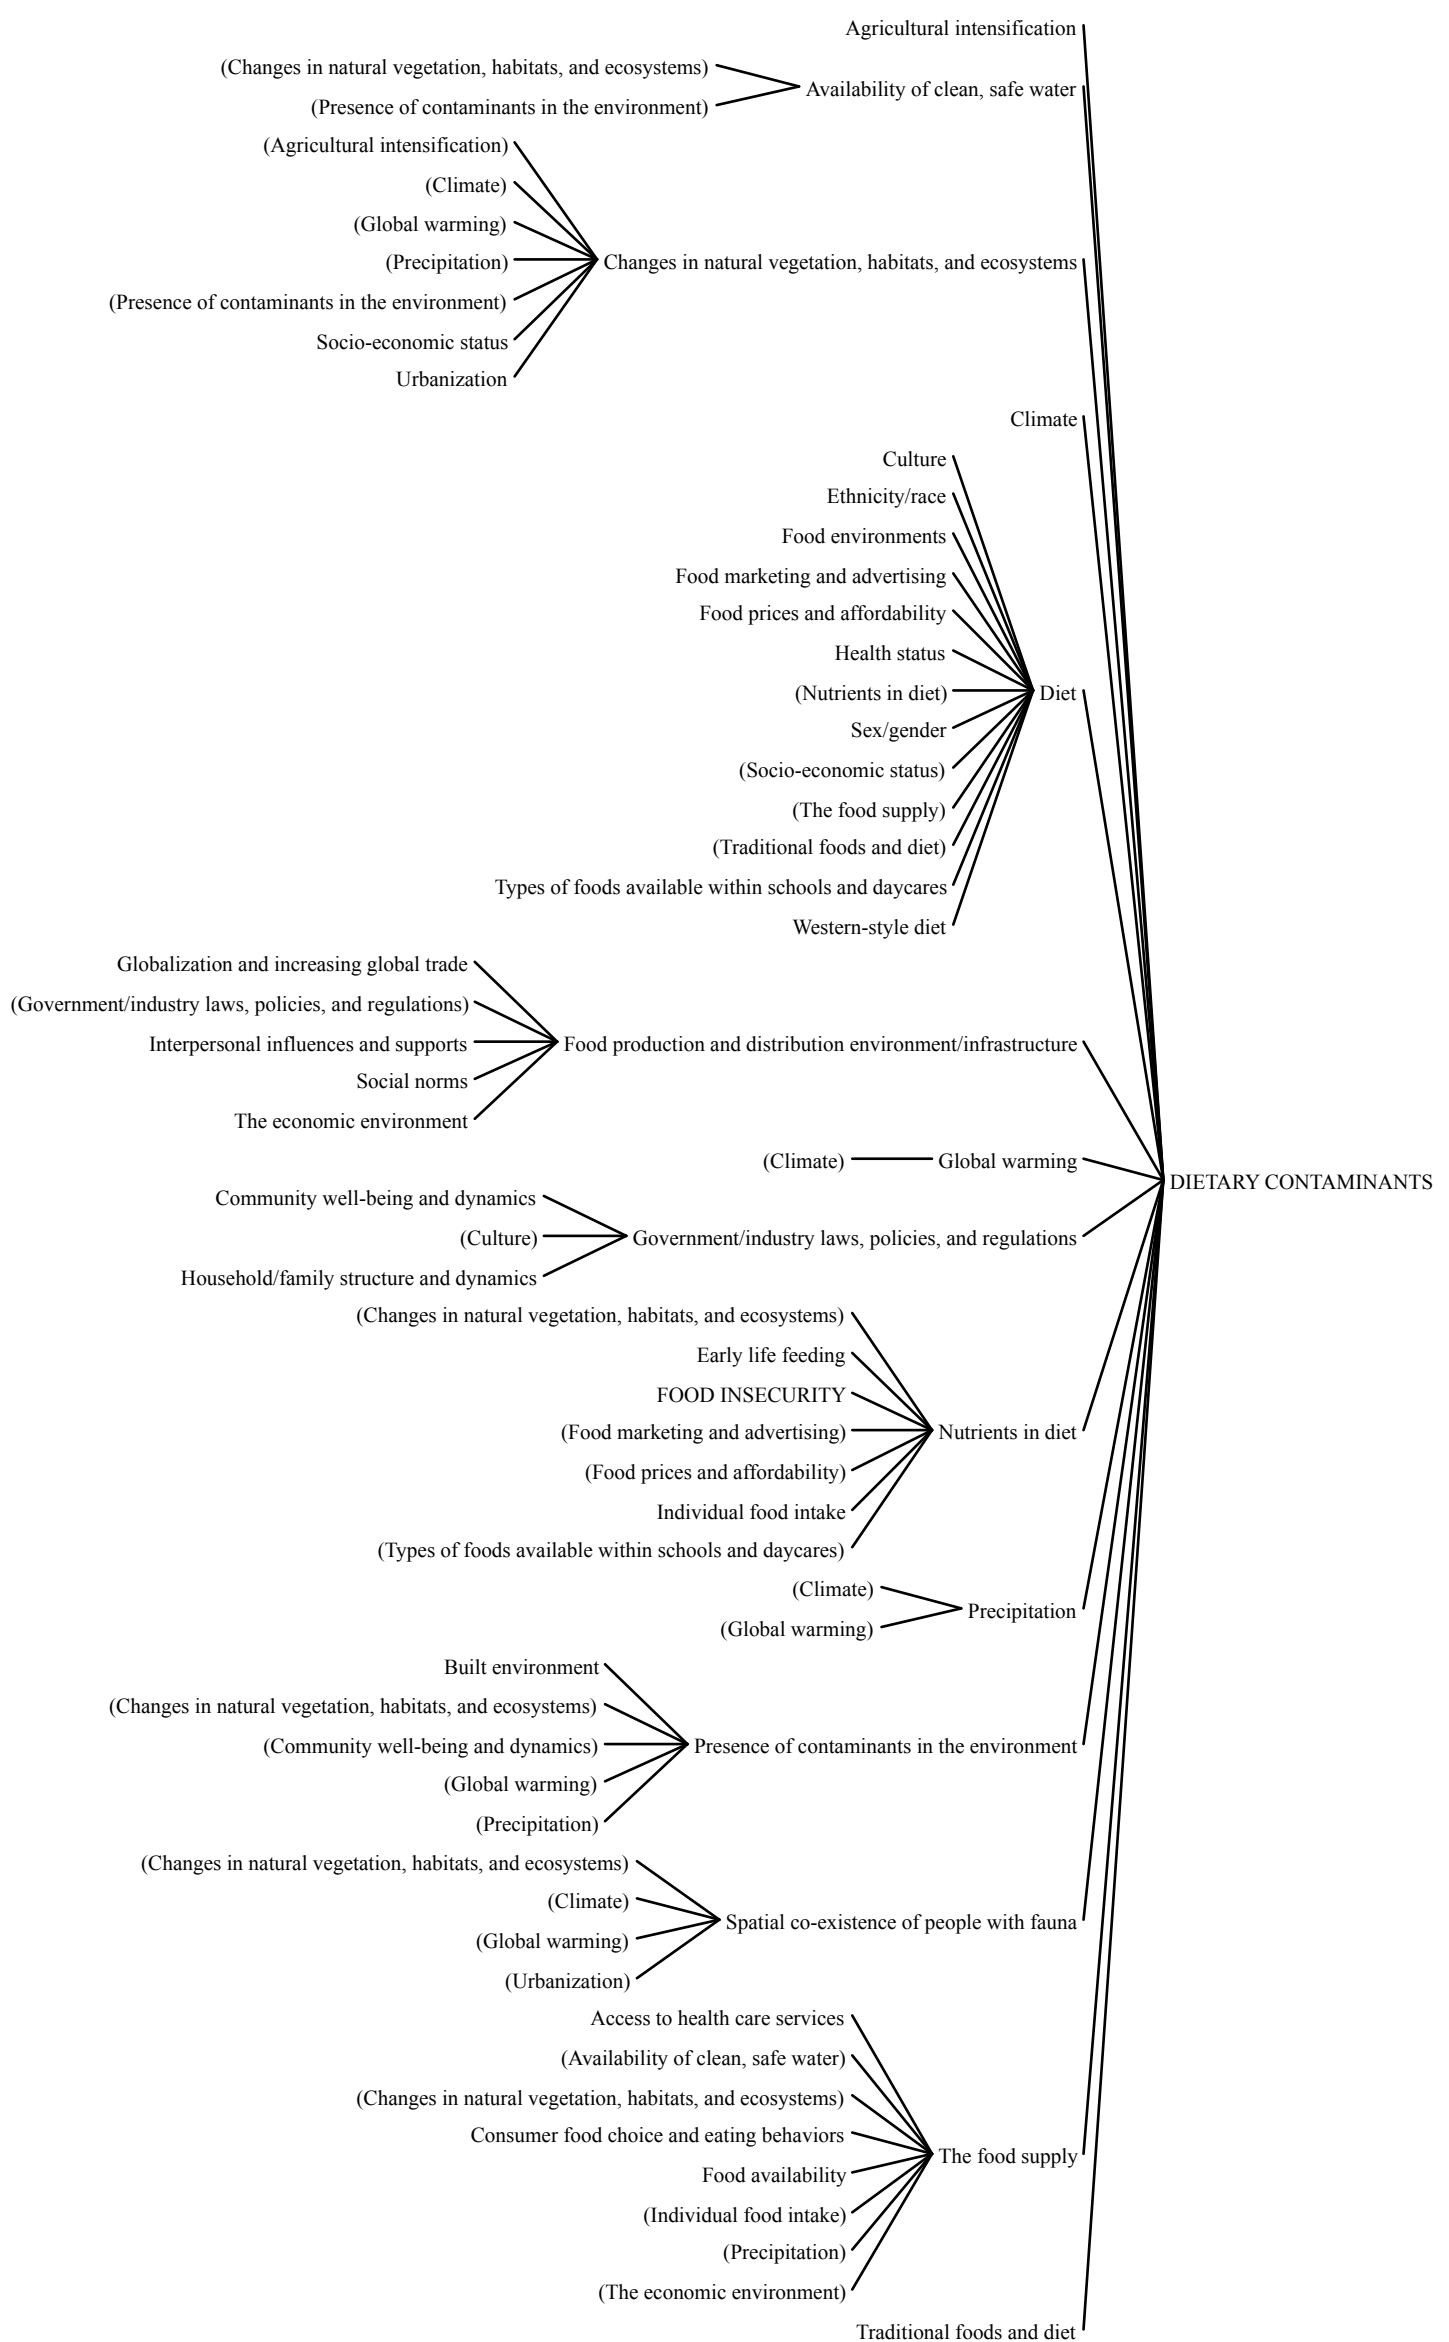

Supplement: 12889_2016_3142_MOESM3_ESM.pdf [file 12889_2016_3142_MOESM3_ESM.pdf]
